# Supplementary material for: Health-related quality of life results from the phase III CheckMate 067 study
Source: PubMed Central journal article supplement — Eur J Cancer. Author manuscript; Available in PMC 2017 Dec 20. (PMC5737813; doi:10.1016/j.ejca.2017.05.031), 2017-06-23
Supplement: NIHMS926889-supplement-2.pdf [file NIHMS926889-supplement-2.pdf]

# EORTC QLQ-C30 Global Health: Change From Baseline

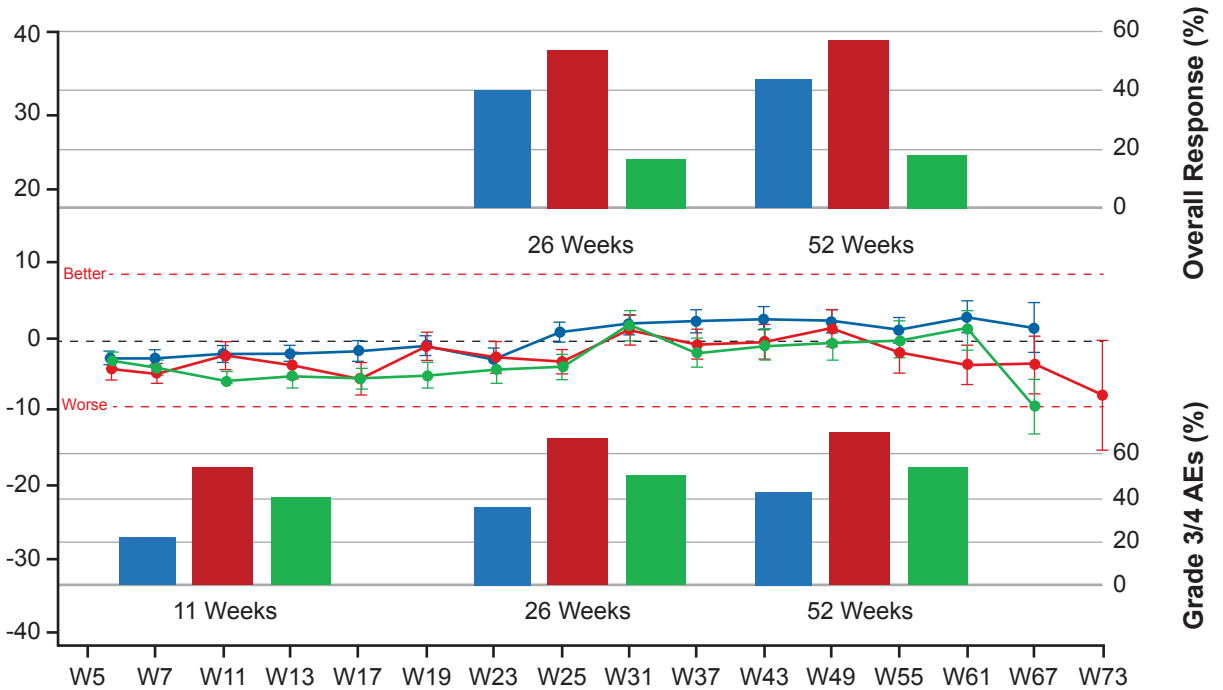

## N by treatment arm

|                        | Week |     |     |     |     |     |     |     |     |     |     |     |     |     |     |     |
|------------------------|------|-----|-----|-----|-----|-----|-----|-----|-----|-----|-----|-----|-----|-----|-----|-----|
|                        | W5   | W7  | W11 | W13 | W17 | W19 | W23 | W25 | W31 | W37 | W43 | W49 | W55 | W61 | W67 | W73 |
| Nivolumab              | 227  | 236 | 197 | 193 | 155 | 164 | -   | 142 | 121 | 112 | 100 | 92  | 63  | 38  | 13  | 3   |
| Nivolumab + ipilimumab | 182  | 182 | 113 | 106 | 83  | 97  | -   | 97  | 92  | 90  | 74  | 65  | 48  | 29  | 16  | 6   |
| Ipilimumab             | 220  | 217 | 163 | 129 | 103 | 97  | -   | 74  | 50  | 48  | 44  | 40  | 24  | 17  | 9   | 0   |
