# Supplementary material for: Health-related quality of life results from the phase III CheckMate 067 study
Source: PubMed Central journal article supplement — Eur J Cancer. Author manuscript; Available in PMC 2017 Dec 20. (PMC5737813; doi:10.1016/j.ejca.2017.05.031), 2017-06-23
Supplement: NIHMS926889-supplement-3.pdf [file NIHMS926889-supplement-3.pdf]

Month 1-6

Month 7- end of study

Follow-up 1

Follow-up 2

|                                                           |                                                |                                                        |                                             |
|-----------------------------------------------------------|------------------------------------------------|--------------------------------------------------------|---------------------------------------------|
| Week 1 and 5 of each 6 week cycle<br>(Baseline – Week 31) | Week 1 of each 6 week cycle<br>(Weeks 37 – 73) | 30 days from<br>last dose ( $\pm 7$ days) <sup>a</sup> | 84 days from<br>follow-up 1 ( $\pm 7$ days) |
|-----------------------------------------------------------|------------------------------------------------|--------------------------------------------------------|---------------------------------------------|
